# Supplementary material for: Sociodemographic and clinical characteristics of youths and parents seeking psychological treatment for school attendance problems
Source: PubMed Central journal article supplement (PMC8791456; doi:10.1371/journal.pone.0261449), 2022-01-26
Supplement: pone.0261449.s001.pdf [file pone.0261449.s001.pdf]

**S1 Table:** Mean and standard deviations from youth and parent ratings on all total scales and sub-scales of SCAS, MFQ, and SDQ grouped by gender and age group

|                     |                               | Youths        |               | Parents       |               |               |
|---------------------|-------------------------------|---------------|---------------|---------------|---------------|---------------|
|                     |                               | Younger       | Older         | Younger       | Older         |               |
|                     |                               | <i>M (SD)</i> | <i>M (SD)</i> | <i>M (SD)</i> | <i>M (SD)</i> |               |
| SCAS-C <sup>a</sup> | Total                         | Boys          | 33.70 (15.38) | 22.76 (13.81) | 36.43 (15.92) | 25.76 (15.85) |
|                     |                               | Girls         | 44.46 (18.41) | 47.56 (17.36) | 40.18 (13.87) | 41.06 (18.65) |
|                     | Social phobia                 | Boys          | 6.80 (3.81)   | 5.61 (3.87)   | 8.98 (4.31)   | 7.15 (4.19)   |
|                     |                               | Girls         | 8.61 (5.03)   | 11.84 (3.81)  | 8.43 (4.53)   | 11.06 (4.13)  |
|                     | Generalized anxiety           | Boys          | 6.85 (3.62)   | 4.87 (3.59)   | 7.61 (3.57)   | 5.52 (3.36)   |
|                     |                               | Girls         | 8.79 (4.17)   | 9.66 (4.03)   | 8.21 (3.20)   | 8.81 (4.22)   |
|                     | Obsessive-compulsive disorder | Boys          | 3.43 (2.23)   | 3.13 (2.84)   | 2.70 (2.50)   | 2.33 (2.61)   |
|                     |                               | Girls         | 4.39 (3.41)   | 5.47 (2.83)   | 3.25 (3.20)   | 3.28 (2.43)   |
|                     | Panic disorder                | Boys          | 5.20 (4.31)   | 3.15 (3.43)   | 4.35 (4.02)   | 3.22 (3.53)   |
|                     |                               | Girls         | 7.79 (5.51)   | 8.87 (6.03)   | 6.36 (4.54)   | 6.97 (6.29)   |
|                     | Fear of physical injury       | Boys          | 3.93 (2.82)   | 2.76 (2.31)   | 4.07 (2.86)   | 2.85 (2.57)   |
|                     |                               | Girls         | 5.04 (3.75)   | 5.53 (2.77)   | 4.57 (2.47)   | 3.94 (2.63)   |
|                     | Separation anxiety            | Boys          | 7.48 (4.34)   | 3.24 (2.93)   | 8.74 (4.53)   | 4.70 (4.00)   |
|                     |                               | Girls         | 9.86 (4.00)   | 6.19 (3.26)   | 9.36 (3.81)   | 7.00 (3.18)   |
| MFQ <sup>b</sup>    | Total                         | Boys          | 17.49 (11.29) | -             | 23.13 (12.86) | -             |
|                     |                               | Girls         | 27.22 (14.32) | -             | 27.68 (13.40) | -             |
| SDQ <sup>c</sup>    | Total                         | Boys          | 14.32 (6.00)  | 13.49 (5.87)  | 14.32 (5.77)  | 16.03 (5.83)  |
|                     |                               | Girls         | 15.73 (7.51)  | 16.10 (6.61)  | 16.09 (4.18)  | 16.14 (6.04)  |
|                     | Conduct problems              | Boys          | 2.23 (1.60)   | 2.09 (1.70)   | 2.14 (1.32)   | 2.39 (2.08)   |
|                     |                               | Girls         | 2.18 (1.40)   | 1.92 (1.87)   | 1.82 (1.66)   | 1.92 (1.93)   |
|                     | Hyperactivity/inattention     | Boys          | 4.45 (2.74)   | 4.71 (2.58)   | 4.18 (2.68)   | 4.49 (2.49)   |
|                     |                               | Girls         | 3.73 (3.07)   | 4.47 (2.76)   | 3.91 (2.91)   | 3.92 (2.37)   |
|                     | Peer relationship problems    | Boys          | 2.00 (1.80)   | 2.21 (1.78)   | 1.95 (1.96)   | 3.14 (1.97)   |
|                     |                               | Girls         | 3.00 (1.67)   | 3.08 (2.05)   | 2.45 (1.13)   | 3.16 (2.07)   |
|                     | Prosocial behavior            | Boys          | 7.45 (1.41)   | 7.16 (1.94)   | 7.14 (2.46)   | 7.13 (2.18)   |
|                     |                               | Girls         | 8.00 (2.14)   | 7.84 (1.48)   | 7.55 (2.21)   | 7.67 (1.88)   |
|                     | Emotional problems            | Boys          | 5.64 (2.52)   | 4.47 (2.44)   | 6.05 (2.54)   | 6.01 (2.49)   |
|                     |                               | Girls         | 6.82 (3.28)   | 6.63 (2.46)   | 7.91 (1.97)   | 7.14 (2.35)   |
|                     | Impact of problems            | Boys          | 1.91 (1.80)   | 1.96 (2.41)   | 4.45 (3.16)   | 4.79 (2.89)   |
|                     |                               | Girls         | 2.45 (2.50)   | 4.00 (3.14)   | 3.55 (2.66)   | 5.31 (3.10)   |

Note: SCAS: Spence Children's Anxiety Scale, MFQ: Mood and Feelings Questionnaire, SDQ-Total: Strength and Difficulties Questionnaire, M: Mean, SD: Standard Deviation,

<sup>a</sup>Using age groups proposed by Arendt, et al., (2014): Children = 6 to 12 years, Adolescents = 13 to 17 years.

<sup>b</sup>No division of age group reported in Danish norms, all cases reported

<sup>c</sup>Using age groups proposed by Arnfred, et al., (2019): Children = 6 to 10 years, Adolescents = 11 to 17 years.
